# Supplementary material
Source: publisher figshare collection journal article supplement (https://acs.figshare.com/ndownloader/files/5068051)

## Supporting Information

### “Gold(III) Dithiocarbamate Derivatives for the Treatment of Cancer: Solution Chemistry, DNA Binding and Hemolytic Properties”

Luca Ronconi, Christine Marzano, Piero Zanello, Maddalena Corsini, Giorgia Miolo, Carlo Maccà, Andrea Trevisan, and Dolores Fregona

Table of contents:

- FT-IR spectral data of the hydrolysis derivatives of complex **4**.
- UV/Vis spectra with time of **1** and **4** in DMSO/PBS solution.
- Hydrolysis profile of **2** at 310 K.
- cyclic voltammograms of **1** and **4** in DMSO.
- Inhibition of DNA and RNA synthesis.
- Detection of DPC induced by **4** (alkaline elution experiments).

Selected IR frequencies of the various species obtained by maintaining compound **4** in PBS solution ( $\text{cm}^{-1}$ ).

| Compound                                | Color         | Vibrational modes |                     |                                |                                 |                                   |
|-----------------------------------------|---------------|-------------------|---------------------|--------------------------------|---------------------------------|-----------------------------------|
|                                         |               | $\nu(\text{OH})$  | $\nu(\text{N-CSS})$ | $\nu_{\text{a,s}}(\text{SCS})$ | $\nu_{\text{a,s}}(\text{SAuS})$ | $\nu_{\text{a,s}}(\text{X Au X})$ |
| <b>4</b>                                | reddish-brown | -                 | 1560                | 1001, 575                      | 406, 382                        | 251, 228 <sup>a</sup>             |
| $[\text{Au}(\text{ESDT})(\text{OH})_2]$ | yellow        | 3436              | 1563                | 1000, 573                      | 408, 384                        | 423, 331 <sup>b</sup>             |
| $[\text{Au}(\text{ESDT})]_2$            | brown-violet  | -                 | 1481                | 1017, 499                      | 341, 321                        | -                                 |

<sup>a</sup>X = Br. <sup>b</sup>X = OH.

Electronic spectra with time of selected gold(III) dithiocarbamate complexes 100  $\mu\text{M}$  in DMSO/PBS solution at 298 K. (a) UV/Vis spectrum of **1** within 48 h. (b) UV/Vis spectrum of **4** within 5 h.

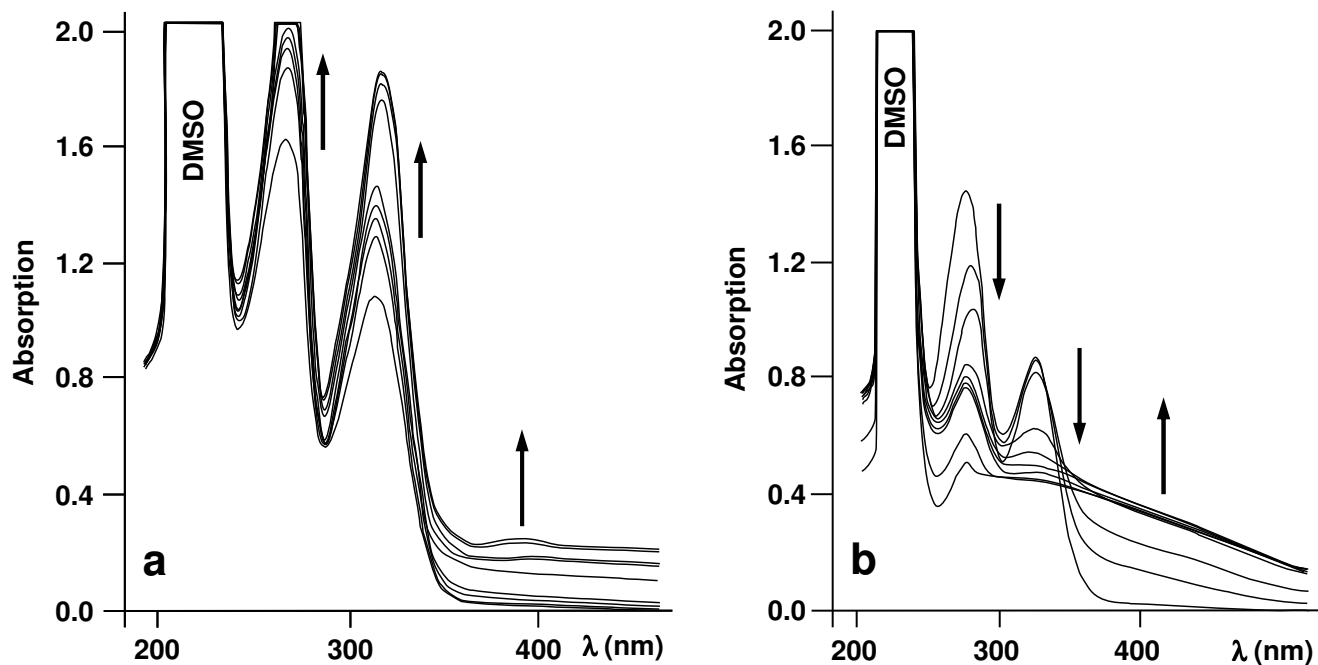

Pattern of halide release of **2** at 310 K in DMSO/phosphate buffered solution (pH 7.4) expressed as the molar ratio delivered halide/starting complex amount vs. time, monitored by potentiometric measurement of halide ion concentration with halide ISE.

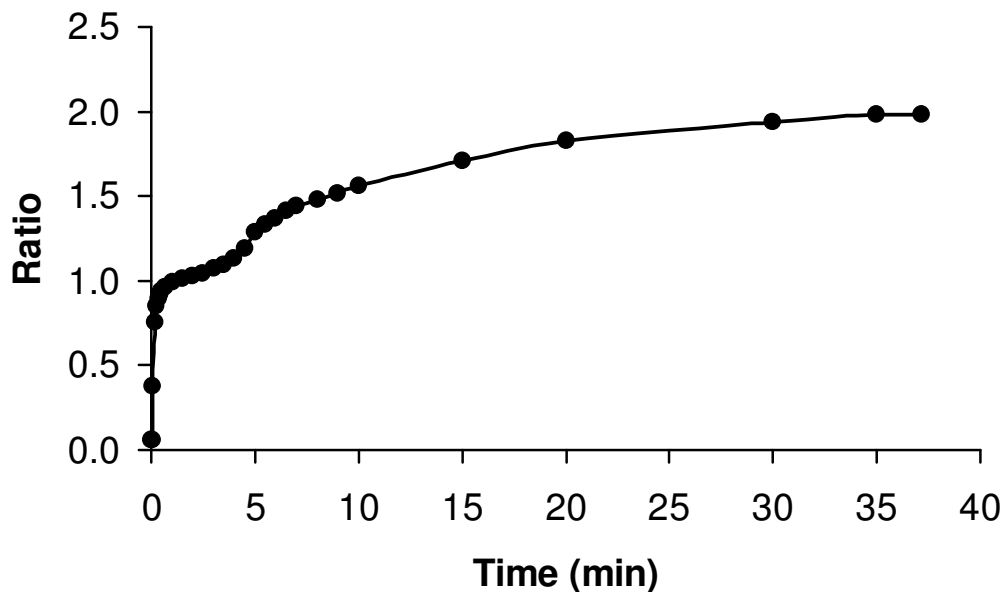

Cyclic voltammograms recorded in DMSO solution at 298 K at both glassy-carbon (—) and platinum (---) electrodes. (a) Cyclic voltammogram of **1** ( $1.2 \times 10^{-3}$  mol dm<sup>-3</sup>). (b) Cyclic voltammogram of **4**

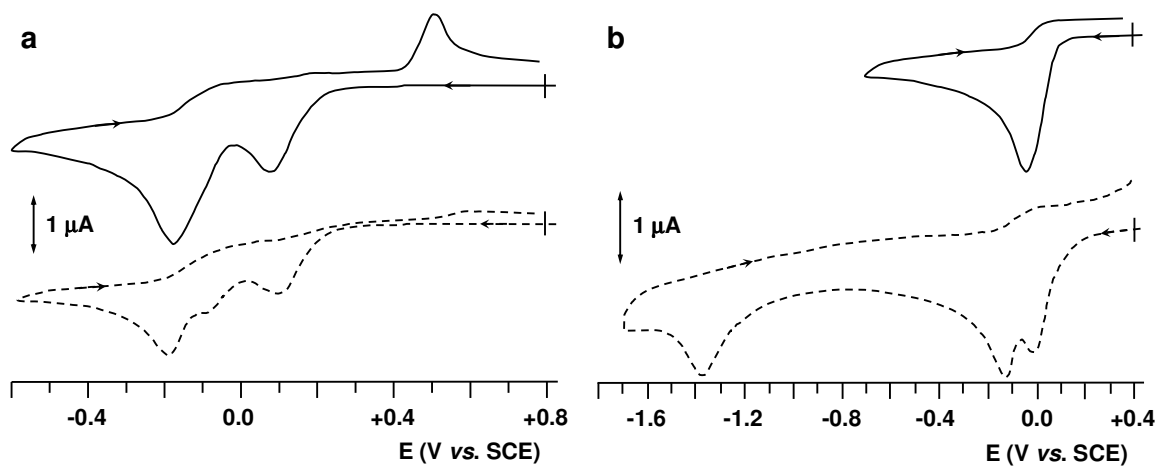

( $1.0 \times 10^{-3}$  mol dm<sup>-3</sup>).

Inhibition of macromolecular synthesis in HL60 cells incubated for 3 h with increasing concentrations of cisplatin (■), 1 (◆), 2 (▲), 3 (×) and 4 (●). Bars represent the corresponding standard deviations. (a) Inhibition of DNA synthesis. (b) Inhibition of RNA synthesis.

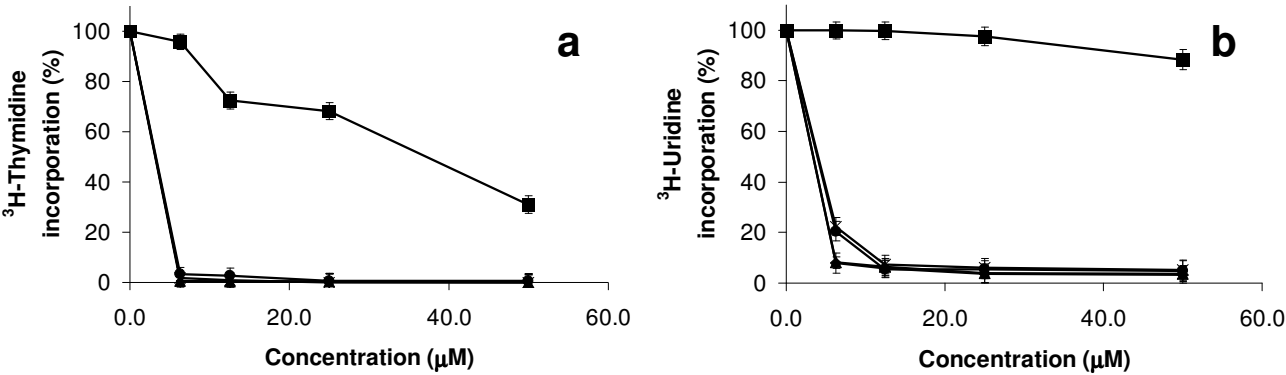

DPC detection by alkaline elution in HL60 cells treated with 25  $\mu\text{M}$  cisplatin (■) or 4 (●), and then exposed to 30 Gy  $\gamma$ rays. Control cells (○) were only exposed to 30 Gy  $\gamma$ rays.

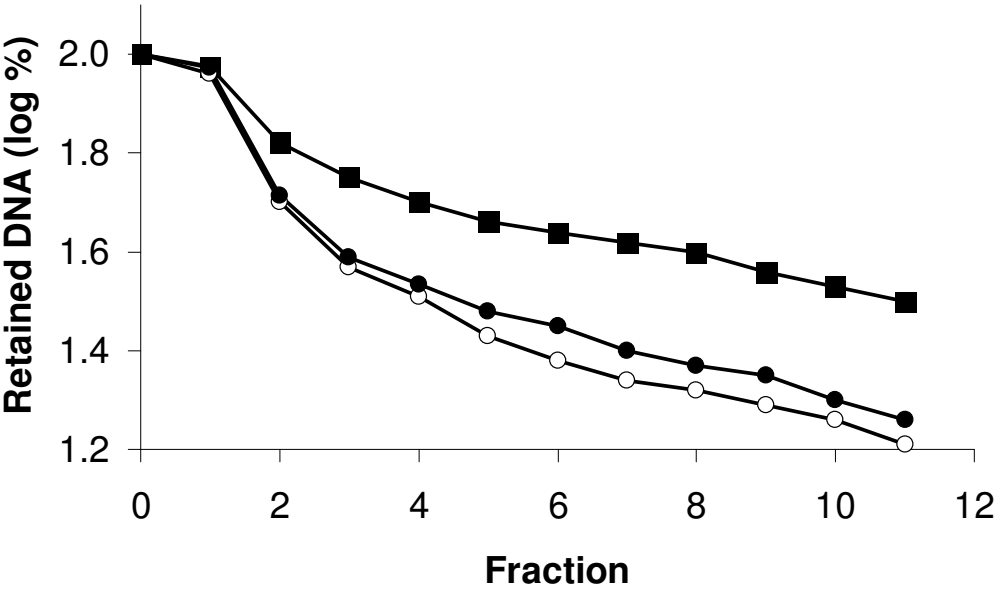

Supplement: Supplementary file 1 [file 5068051]
